# Supplementary material
Source: publisher site journal article supplement (https://www.spandidos-publications.com/3856/downloadSupplementary)
Supplement: Supplementary file 1 [file downloadSupplementary]

Table SI. Association of adverse events grade 2/3 with modality treatment and performance status.

| Adverse event         | Modality treatment and PS | OR     | CI           | P-value             |
|-----------------------|---------------------------|--------|--------------|---------------------|
| Stomatitis grade 2/3  | Surgery                   | 11.818 | 3.207-43.550 | <0.001 <sup>a</sup> |
|                       | Concurrent CT             | 3.125  | 1.007-9.699  | 0.044 <sup>a</sup>  |
| Esophagitis grade 2/3 | Concurrent CT-RT          | 3.500  | 1.185-10.335 | 0.020 <sup>a</sup>  |
| Dysphagia grade 2/3   | Concurrent CT-RT          | 3.968  | 1.385-11.369 | 0.008 <sup>a</sup>  |
| Pain grade 2/3        | Concurrent CT-RT          | 5.067  | 1.608-15.967 | 0.004 <sup>a</sup>  |
|                       | CT after RT               | 3.417  | 1.108-10.553 | 0.028 <sup>a</sup>  |
| Mycosis               | Concurrent CT-RT          | 6.000  | 2.096-17.173 | 0.001 <sup>a</sup>  |
|                       | PS1/2                     | 4.640  | 1.569-13.728 | 0.004 <sup>a</sup>  |
|                       | CT after RT               | 4.667  | 1.568-13.886 | 0.004 <sup>a</sup>  |
|                       | CT only                   | 0.350  | 0.123-0.994  | 0.045 <sup>a</sup>  |

<sup>a</sup>Pearson's  $\chi^2$  test. CI, confidence interval; CT, chemotherapy; OR, odds ratio; PS, performance status; RT, radiotherapy.
